# Supplementary material for: Nanoparticle–nanoparticle vs. nanoparticle–substrate hot spot contributions to the SERS signal: studying Raman labelled monomers, dimers and trimers
Source: Royal Society of Chemistry journal article supplement (doi:10.1039/c6cp08254h), 2016-12-15
Supplement: c6cp08254h1.pdf [file c6cp08254h1.pdf]

## Electronic Supplementary Information

Table S1. Calculation of agglomeration in Immunoassay test (experiment 5, blank, Au NPs 60 nm on Au film, total area 36  $\mu\text{m}^2$ ).

| N <sub>o</sub> | Nm   | Nd   | Nt   | Na*  | Number of NPs in agglomerates | Agglo-meration, % | Total number of NPs | Total number of NPs per 1 $\mu\text{m}^2$ |
|----------------|------|------|------|------|-------------------------------|-------------------|---------------------|-------------------------------------------|
| 1              | 37   | 13   | 2    | 6    | 27                            | 61                | 96                  | 2.7                                       |
| 2              | 39   | 12   | 3    | 8    | 76                            | 74                | 148                 | 4.1                                       |
| 3              | 24   | 7    | 3    | 11   | 64                            | 78                | 111                 | 3.1                                       |
| 4              | 40   | 6    | 5    | 3    | 18                            | 53                | 85                  | 2.4                                       |
| 5              | 22   | 9    | 2    | 4    | 38                            | 74                | 84                  | 2.3                                       |
| Mean           | 32   | 9    | 3    | 6    | 45                            | 68                | 105                 | 2.9                                       |
| Mean, %        | 30.4 | 8.57 | 2.85 | 5.71 | 42.8                          | 64.7              | 100                 |                                           |

\*Na – number of agglomerates.

Table S2. Calculation of agglomeration in Immunoassay test (Experiment 5, MPT64 0.8 nM, Au NPs 60 nm on Au film, total area 36  $\mu\text{m}^2$ ).

| N <sub>o</sub> | Nm  | Nd | Nt | Na | Number of NPs in agglomerates | Agglo-meration, % | Total number of NPs | Total number of NPs per 1 $\mu\text{m}^2$ |
|----------------|-----|----|----|----|-------------------------------|-------------------|---------------------|-------------------------------------------|
| 1              | 111 | 23 | 13 | 10 | 61                            | 57                | 257                 | 7.1                                       |
| 2              | 146 | 23 | 10 | 10 | 53                            | 47                | 275                 | 7.7                                       |
| 3              | 122 | 37 | 12 | 14 | 81                            | 61                | 313                 | 8.7                                       |
| 4              | 144 | 24 | 7  | 14 | 86                            | 52                | 299                 | 8.3                                       |
| 5              | 101 | 28 | 18 | 13 | 77                            | 65                | 288                 | 8.0                                       |
| Mean           | 125 | 27 | 12 | 12 | 71                            | 54                | 286                 | 7.9                                       |

Table S3. Surface roughness of the substrates as determined by AFM

| Surface        | Au film | Ag film | Si wafer | Al film |
|----------------|---------|---------|----------|---------|
| Mean value, nm | 2.82    | 3.58    | 3.87     | 3.23    |
| RSD, %         | 17.4    | 8.02    | 3.19     | 12.6    |

Table S4. Characteristics of the obtained samples (mean calculated values).

| Experiment №, analyte | Substrate | NPs, D nm | I <sub>bg</sub> /I <sub>m</sub> /I <sub>d</sub> /I <sub>t</sub> /I <sub>t</sub> cps, (norm. to 1 mW laser power) | I <sub>d</sub> /I <sub>m</sub> , Standard error | I <sub>t</sub> /I <sub>m</sub> , Standard error | EF <sub>m</sub>                 | EF <sub>d</sub>                 | EF <sub>t</sub>                 | Nm/ Nd/ Nt |
|-----------------------|-----------|-----------|------------------------------------------------------------------------------------------------------------------|-------------------------------------------------|-------------------------------------------------|---------------------------------|---------------------------------|---------------------------------|------------|
|                       |           |           |                                                                                                                  |                                                 |                                                 | ×10 <sup>6</sup> mean, max, min | ×10 <sup>6</sup> mean, max, min | ×10 <sup>6</sup> mean, max, min |            |
| 1, 2-MOTP             | Au        | Au, 80    | 15/1013/2848/-                                                                                                   | <b>2.84</b> , 0.53                              |                                                 | 10.9                            | 15.5                            |                                 | 15/        |
|                       |           |           |                                                                                                                  |                                                 |                                                 | 17                              | 29                              |                                 | 10/-       |
|                       |           |           |                                                                                                                  |                                                 |                                                 | 2.6                             | 6.5                             |                                 |            |
| 1, 2-MOTP             | Ag        | Au, 80    | 14/1081/3670/-                                                                                                   | <b>3.42</b> , 0.60                              |                                                 | 11.7                            | 20.0                            |                                 | 10/        |
|                       |           |           |                                                                                                                  |                                                 |                                                 | 17                              | 31                              |                                 | 10/-       |
|                       |           |           |                                                                                                                  |                                                 |                                                 | 7.6                             | 6.3                             |                                 |            |
| 2, 2-ATP              | Au        | Ag, 100   | 9/2128/6446/-                                                                                                    | <b>3.04</b> , 0.48                              |                                                 | 5.0                             | 7.6                             |                                 | 33/        |
|                       |           |           |                                                                                                                  |                                                 |                                                 | 16.2                            | 13.7                            |                                 | 18/-       |
|                       |           |           |                                                                                                                  |                                                 |                                                 | 1.2                             | 3.1                             |                                 |            |
| 2, 2-ATP              | Al        | Ag, 100   | 8/923/2445/5997                                                                                                  | <b>2.66</b> , 0.5                               | 6.54 1.5                                        | 2.2                             | 2.9                             | 4.7                             | 18/        |
|                       |           |           |                                                                                                                  |                                                 |                                                 | 4.3                             | 8.0                             | 16.5                            | 15/        |
|                       |           |           |                                                                                                                  |                                                 |                                                 | 0.38                            | 1.2                             | 1.3                             | 18         |
| 2, 2-ATP              | Ag        | Ag, 100   | 12/10376/22757/-                                                                                                 | <b>2.20</b> , 0.27                              |                                                 | 24                              | 27                              |                                 | 40/        |
|                       |           |           |                                                                                                                  |                                                 |                                                 | 60                              | 114                             |                                 | 28/-       |
|                       |           |           |                                                                                                                  |                                                 |                                                 | 3.7                             | 15                              |                                 |            |
| 3, 2-ATP              | Au        | Au, 60    | 10/120/333/564                                                                                                   | <b>2.93</b> , 0.34                              | 5.05 1.66                                       | 0.7                             | 1.1                             | 1.2                             | 40/        |
|                       |           |           |                                                                                                                  |                                                 |                                                 | 3.0                             | 1.5                             | 3.6                             | 22/        |
|                       |           |           |                                                                                                                  |                                                 |                                                 | 0.14                            | 0.7                             | 0.41                            | 8          |
| 3, 2-ATP              | Ag        | Au, 60    | 20/399/1283/-                                                                                                    | <b>3.33</b> , 0.50                              |                                                 | 2.5                             | 4.1                             |                                 | 22/        |
|                       |           |           |                                                                                                                  |                                                 |                                                 | 3.9                             | 8.2                             |                                 | 14/-       |
|                       |           |           |                                                                                                                  |                                                 |                                                 | 1.2                             | 1.5                             |                                 |            |
| 3, 2-ATP              | Si        | Au, 60    | 8/14.1/70.0/97.1                                                                                                 | <b>9.55</b> , 0.44                              | 13.7 0.437                                      | 0.043                           | 0.20                            | 0.20                            | 28/        |
|                       |           |           |                                                                                                                  |                                                 |                                                 | 0.057                           | 0.4                             | 0.24                            | 23/        |
|                       |           |           |                                                                                                                  |                                                 |                                                 | 0.033                           | 0.098                           | 0.15                            | 6          |
| 4, (532) 4-NBT hIgG*  | Au        | Au, 60    | 19/43.9/76.5/-                                                                                                   | <b>2.26</b> , 0.24                              |                                                 | 0.011                           | 0.012                           |                                 | 20/        |
|                       |           |           |                                                                                                                  |                                                 |                                                 | 0.014                           | 0.023                           |                                 | 19/-       |
|                       |           |           |                                                                                                                  |                                                 |                                                 | 0.006                           | 0.007                           |                                 |            |
| 4, 4-NBT hIgG         | Au        | Au, 60    | 9/1048/2403/-                                                                                                    | <b>2.35</b> , 0.28                              |                                                 | 0.44                            | 0.51                            |                                 | 20/        |
|                       |           |           |                                                                                                                  |                                                 |                                                 | 0.76                            | 0.94                            |                                 | 12/-       |
|                       |           |           |                                                                                                                  |                                                 |                                                 | 0.29                            | 0.22                            |                                 |            |
| 5, 4-NBT, MPT64       | Si        | Au, 60    | 8.5/15.4/753/1028                                                                                                | <b>107</b> , 12                                 | 148 13.8                                        | 0.003                           | 0.16                            | 0.14                            | 15/        |
|                       |           |           |                                                                                                                  |                                                 |                                                 | 0.004                           | 0.62                            | 0.29                            | 25/        |
|                       |           |           |                                                                                                                  |                                                 |                                                 | 0.002                           | 0.016                           | 0.03                            | 10         |
| 5, 4-NBT, MPT64       | Au        | Au, 60    | 12/1039/2577/-                                                                                                   | <b>2.49</b> , 0.39                              |                                                 | 0.44                            | 0.5                             |                                 | 33/        |
|                       |           |           |                                                                                                                  |                                                 |                                                 | 0.94                            | 1.5                             |                                 | 17/-       |
|                       |           |           |                                                                                                                  |                                                 |                                                 | 0.71                            | 0.25                            |                                 |            |
| 5, 4-NBT, MPT64       | Ag        | Au, 60    | 21/810/2491/-                                                                                                    | <b>3.12</b> , 0.48                              |                                                 | 0.34                            | 0.52                            |                                 | 17/        |
|                       |           |           |                                                                                                                  |                                                 |                                                 | 0.70                            | 1.0                             |                                 | 15/-       |
|                       |           |           |                                                                                                                  |                                                 |                                                 | 0.18                            | 0.19                            |                                 |            |
| 6, 2-MOTP InM**       | Au        | Au, 80    | 10/95/277/513                                                                                                    | <b>3.15</b> , 0.57                              | 5.94 1.09                                       | 6625                            | 10463                           | 13139                           | 16/        |
|                       |           |           |                                                                                                                  |                                                 |                                                 | 13201                           | 27107                           | 21001                           | 18/        |
|                       |           |           |                                                                                                                  |                                                 |                                                 | 3101                            | 3953                            | 8131                            | 5          |
| 7, 4-NBT              | Au        | Au, 100   | 13/1200/3411                                                                                                     | <b>2.86</b> , 0.38                              |                                                 | 0.25                            | 0.35                            |                                 | 15         |
|                       |           |           |                                                                                                                  |                                                 |                                                 | 0.35                            | 0.53                            |                                 | 8          |
|                       |           |           |                                                                                                                  |                                                 |                                                 | 0.13                            | 0.20                            |                                 |            |

Total of 615 nano antennas : monomers 342, dimers 226, trimers 47.

\* Laser wavelength 532 nm \*\* assuming that each AuNPs covered with 14 molecules of 2-MOTP as calculated

Table S5. Mean values for distance between NPs (Gap) calculated from TEM data.

| NPs                                          | Gap, TEM, nm<br>(±Standard error, nm) | N gaps |
|----------------------------------------------|---------------------------------------|--------|
| AuNPs, 60 nm in ERL, 4-NBT, dimers           | 3.1±0.6                               | 15     |
| AuNPs, 60 nm in ERL, 4-NBT, all agglomerates | 3.5±0.5                               | 38     |
| AuNPs 60 nm, 4-ATP, dimers                   | 1.1±0.3                               | 16     |
| AuNPs, 60 nm, 4-ATP, all agglomerates        | 1.0±0.2                               | 42     |
| AuNPs, 80 nm, 2-MOTP, dimers                 | 0.8±0.2                               | 15     |
| AuNPs, 80 nm 2-MOTP, all agglomerates        | 0.8±0.2                               | 30     |

Table S6. The values of SD and SEM (standard error of mean) for SERS intensities.

| Experiment N,<br>analyte | Sub-<br>strate | NPs,<br>nm | SD, for<br>monomers, % | SEM for<br>monomers, % | SD for<br>dimers, % | SEM for<br>dimers, % |
|--------------------------|----------------|------------|------------------------|------------------------|---------------------|----------------------|
| 1) 2MOTP                 | Au             | Au, 80     | 41.8                   | 7.52                   | 42.7                | 9.33                 |
| 1) 2MOTP                 | Ag             | Au, 80     | 43.4                   | 12.6                   | 54.9                | 14.2                 |
| 2) 2-ATP                 | Au             | Ag, 100    | 50.6                   | 10.3                   | 41.1                | 9.70                 |
| 2) 2-ATP                 | Al             | Ag, 100    | 44.9                   | 10.6                   | 60.5                | 15.6                 |
| 2) 2-ATP                 | Ag             | Ag, 100    | 53.0                   | 9.33                   | 42.6                | 8.05                 |
| 3) 2-ATP                 | Au             | Au, 60     | 36.8                   | 7.41                   | 20.9                | 4.47                 |
| 3) 2-ATP                 | Ag             | Au, 60     | 29.8                   | 6.35                   | 47.4                | 12.6                 |
| 3) 2-ATP                 | Si             | Au, 60     | 13.2                   | 2.49                   | 40.7                | 8.49                 |
| 4) 4-NBT*(532) hIgG      | Au             | Au, 60     | 28.6                   | 6.41                   | 36.9                | 8.26                 |
| 4) 4-NBT hIgG            | Au             | Au, 60     | 30.6                   | 7.96                   | 35.8                | 10.3                 |
| 5) 4-NBT, MPT64          | Si             | Au, 60     | 15.2                   | 3.92                   | 111                 | 22.3                 |
| 5) 4-NBT, MPT64          | Au             | Au, 60     | 42.1                   | 7.33                   | 57.4                | 13.9                 |
| 5) 4-NBT, MPT64          | Ag             | Au, 60     | 40.1                   | 9.72                   | 47.6                | 12.3                 |
| 6) 2MOTP 1nM**           | Au             | Au 80      | 46.7                   | 11.6                   | 65.9                | 15.5                 |

### Enhancement factor calculations

$$EF = (I_{SERS}/I_{Raman})(N_{SERS}/N_{Raman}) = (I_{SERS}/I_{Raman})(N_{V_{BULK}} V_{Laser}/C_S)$$

In Experiment 1 (AuNPs 80 nm/ Au film)

$$EF (\text{monomer}) = (795/171.4)(100500/1.88E+11) = 9.44E+06$$

$$N_{Raman} = (\text{density (g/ml)} * \text{Avogadro's number} / \text{Molar mass 2-MOTP}) * V_{Laser} (\mu\text{m}^3) / 10^{12} (\mu\text{m}^3/\text{ml}) =$$

$$1.88E+11, \text{ Here density(g/ml)} = 1.152, \text{ FM} = 140.2 \text{ g/mole}$$

$$N_{Raman} = (1.152 * 6.02E+23 / 140.2) * 38 / 1E+12 = 1.88E+11$$

$N_{\text{SERS}} = \text{NPs Surface area (nm}^2\text{)} / \text{MOTP Surface cross section ( nm}^2\text{)} = 2.01\text{E}+4 / 0.2 = 100.5 \times 10^3$   
 molecules/NP., where NPs Surface area (nm<sup>2</sup>) =  $4 \cdot \pi \cdot (\text{Radius NPs nm})^2 = 4 \cdot 3.14 \cdot 40^2 = 2.01\text{E}+4$  (nm<sup>2</sup>),  
 0.2 nm<sup>2</sup> is surface cross section of 2-MOTP.

In Experiment 1 for dimer:  $\text{EF (dimer)} = (2258/171.4)(201000/1.88\text{E}+11) = 1.23\text{E}+06$ . where  $N_{\text{SERS}} = 2 \cdot 100500$ .

Experiments 2 to 5 follow the same procedure using very conservative assumption for EF calculation ( monolayer coverage with thiol molecules) .

In Experiment 6:

$\text{EF ( mean for monomers)} = (94.5/171.4)(14.01/1.88\text{E}+11) = 6.63\text{E}+9$

$N_{\text{SERS}} = 14.01$  molecules per one NP,  $N_{\text{SERS}} = \text{number of analyte molecules per one NPs} = \text{N molecules analite per nm}^2$  (on NPs and on Substrate) / One NPs Surface area (nm<sup>2</sup>) =  $6.94\text{E}-4 / 2.01\text{E}+4 = 14.01$

One NPs Surface area (nm<sup>2</sup>) =  $4 \cdot \pi \cdot (\text{Radius NPs nm})^2 = 4 \cdot 3.14 \cdot 40^2 = 2.01\text{E}+4$  (nm<sup>2</sup>)

$\text{N molecules of analyte per nm}^2$  (NPs+ Substrate) =  $\text{N molecules analyte in drop} / (\text{NPs Surf in drop and Substrate Surface nm}^2) = 1.51\text{E}+10 / 2.16\text{E}+13 = 6.97\text{E}+4$

$\text{NPs Surf in drop and Substrate Surface (nm}^2\text{)} = \text{All NPs Surface area in drop (nm}^2\text{)} + \text{Substrate Surface area (nm}^2) = 1.96\text{E}+12 + 1.96\text{E}+13 = 2.16\text{E}+13$

$\text{Substrate Surface area (nm}^2\text{)} = 1.96\text{E}+13 = \pi R^2 = 3.14 \cdot 2500000^2$

$\text{All NPs Surface area in drop (nm}^2\text{)} = 1.96\text{E}+12 = \text{One NPs Surface area (nm}^2\text{)} \cdot \text{Number NPs in drop} = 2.01\text{E}+4 \cdot 9.75\text{E}+7 = 1.96\text{E}+12$

$\text{N NPs in the drop} = 9.75\text{E}+7 = \text{V drop NPs per L} \cdot \text{concentration, particles/L} = 2.5\text{E}-5 \cdot 3.9\text{E}+12$

Example and order of combining Raman signal map and AFM map for Ag NPs 100 nm on Al substrate in experiment 2. Original files (Origin 2015 and Aist-NT SPM) can be downloaded from: <https://www.dropbox.com/sh/7zpavdfitarvpbp/AAC7yWdfoUxZ2FkcbqUu0wUsa?dl=0>

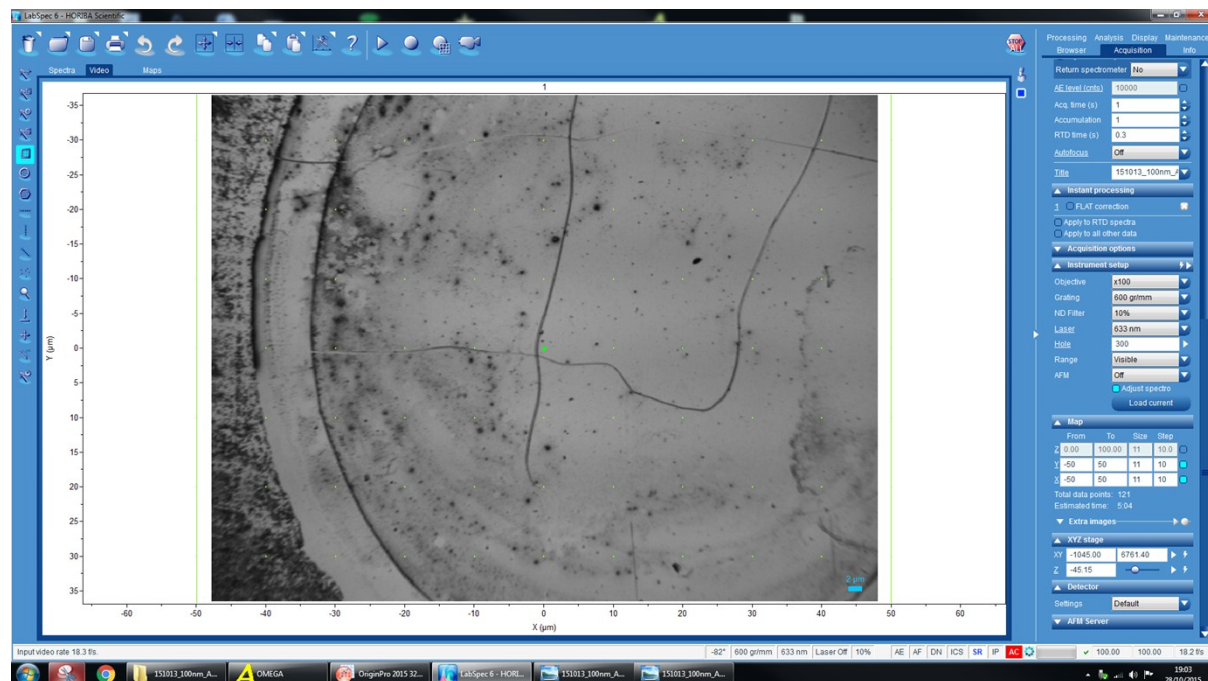

Fig. S1 Screen photo (objective x10) before recording Raman map, in the center of this photo smaller maps (using objective x100) were recorded.

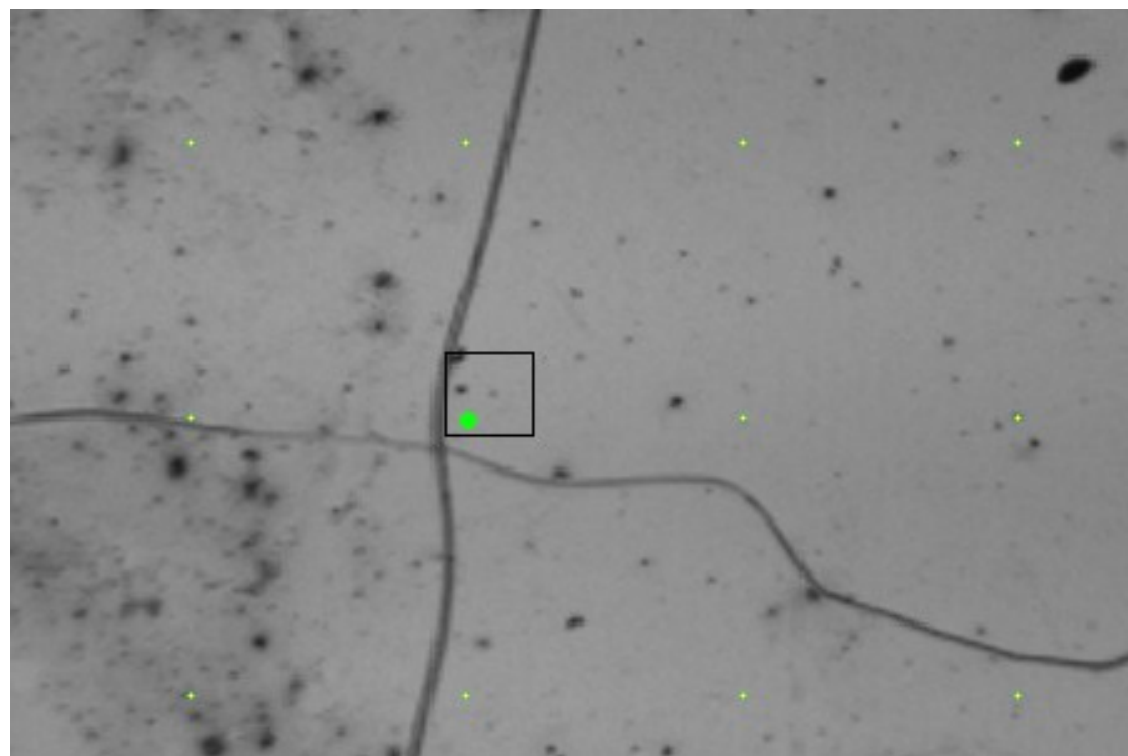

Fig. S2 Screen photo (objective x10) before recording Raman map (100x100 µm), in the same place as AFM map.

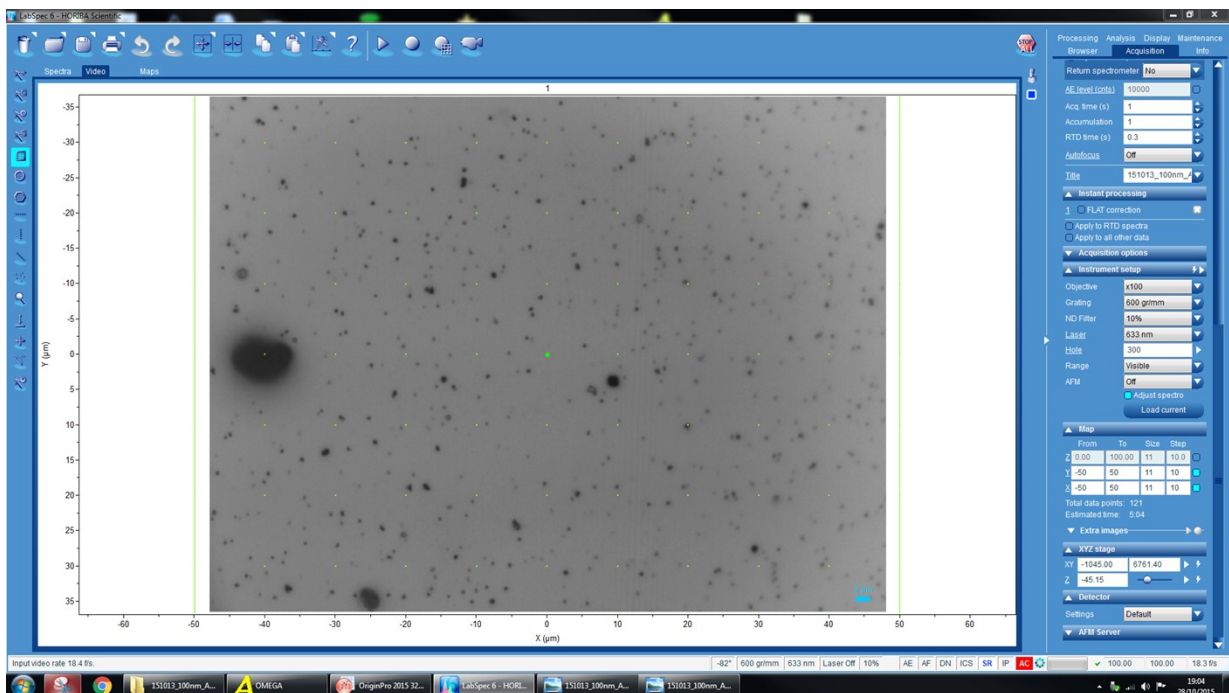

Fig. S3 Screen photo (objective x100) before recording Raman map (100x100  $\mu\text{m}$ ), in the same place as AFM map.

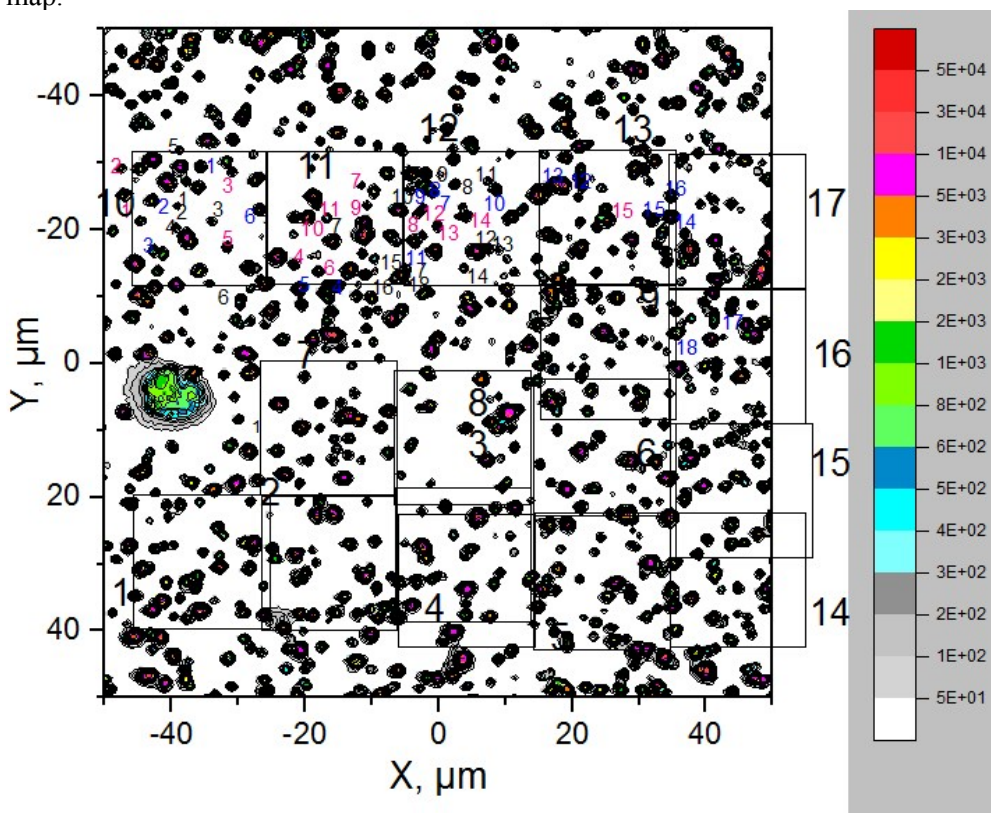

Fig. S4 SERS signal determination from nanoparticles, (Raman intensity map 100x100  $\mu\text{m}$ , step 0.5  $\mu\text{m}$ ), places marked by squares where AFM maps 20x20  $\mu\text{m}$  have been recorded.

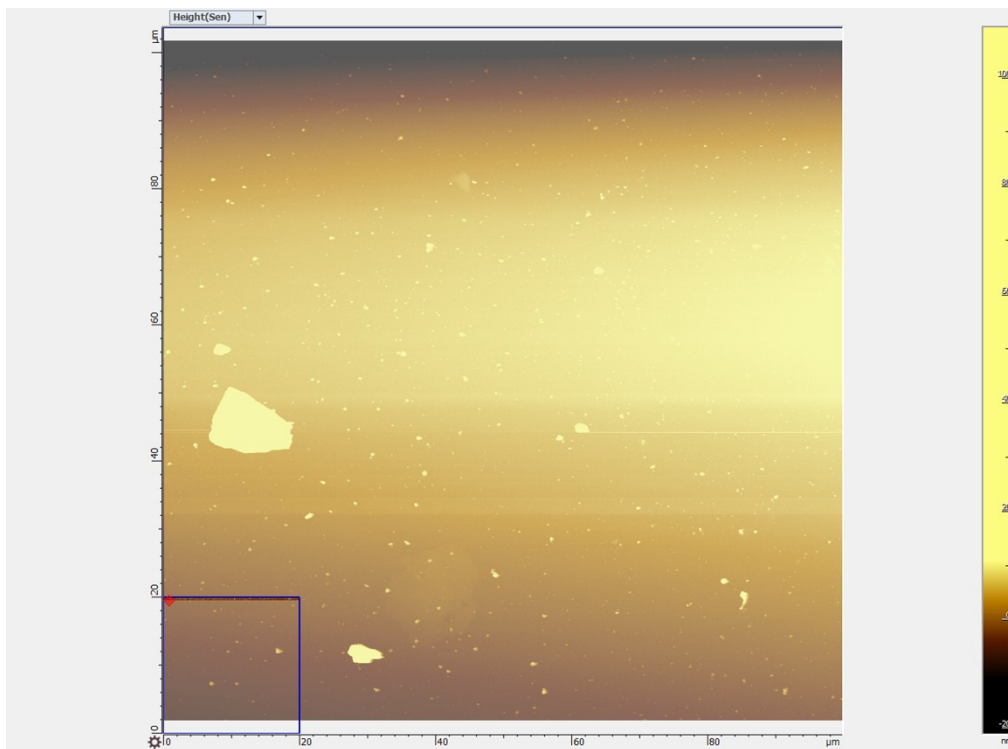

Fig. S5 Screen photo of AFM map, 100x100 μm in same place where Raman intensity map was recorded.

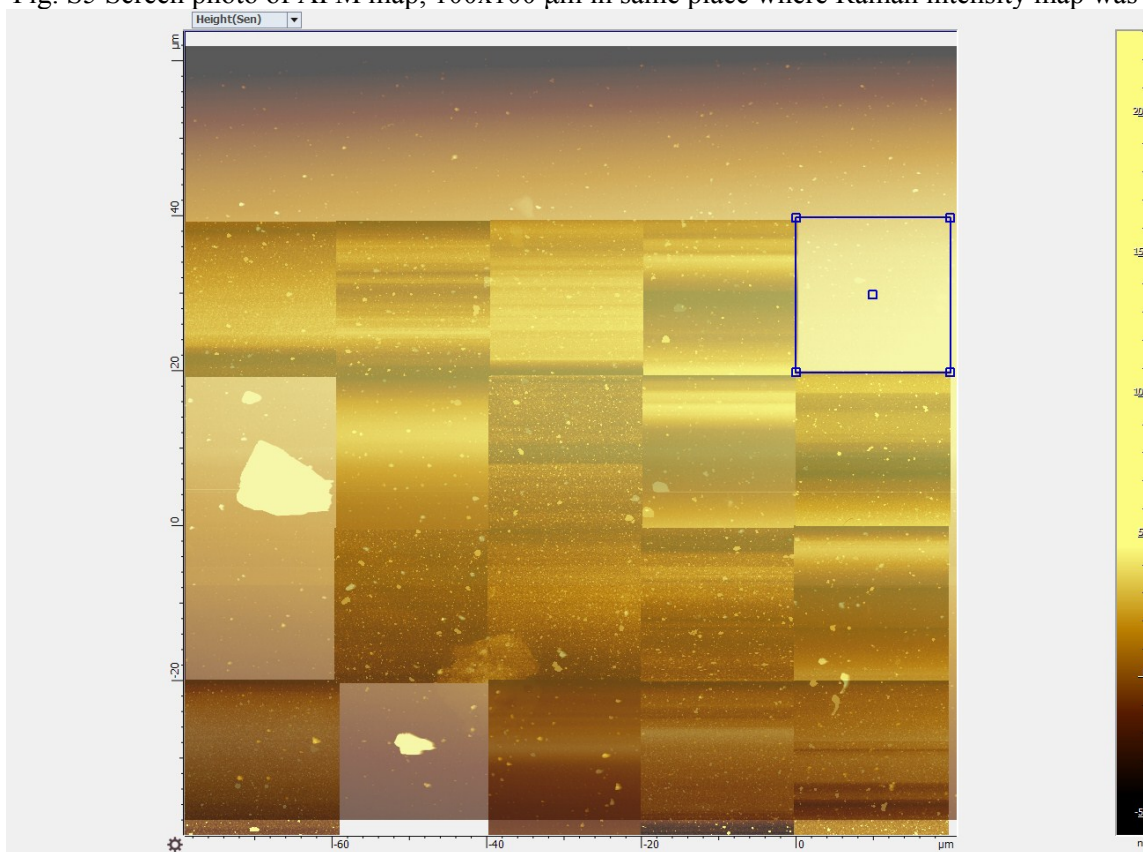

Fig. S6 Screen photo of AFM map 100x100 μm, that was used as mask for recording AFM maps 20x20 μm.

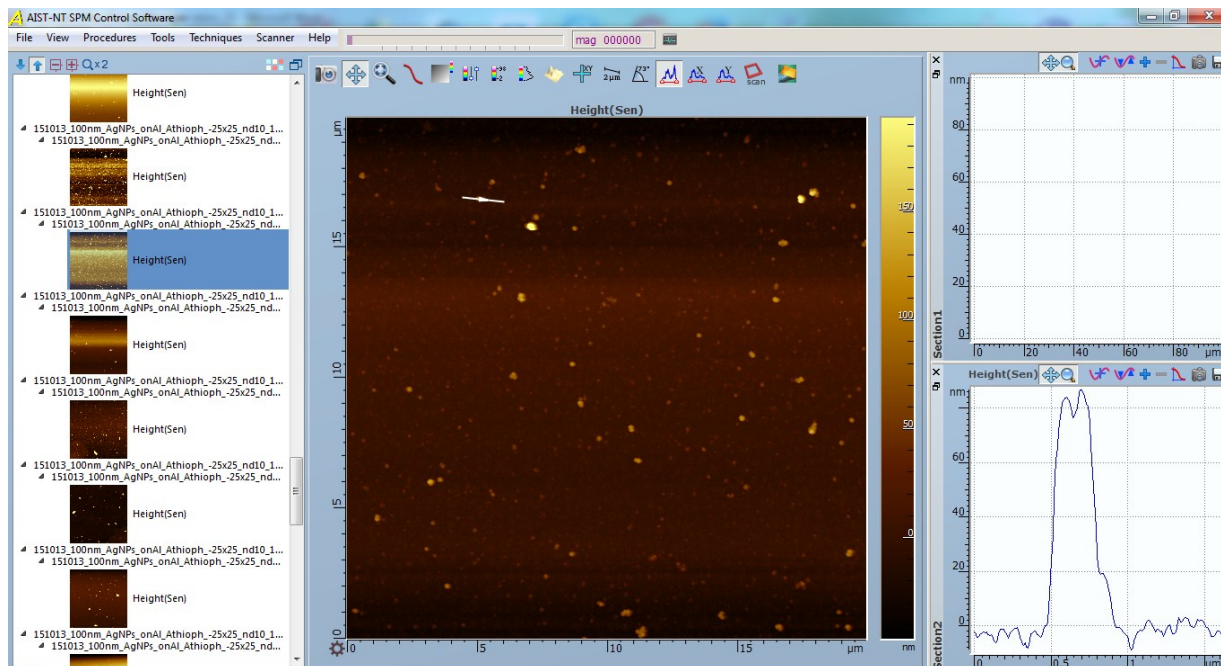

Fig. S7 Screen photo of one of 17 AFM maps 20x20 μm that were recorded using AFM map 100x100 μm as mask.

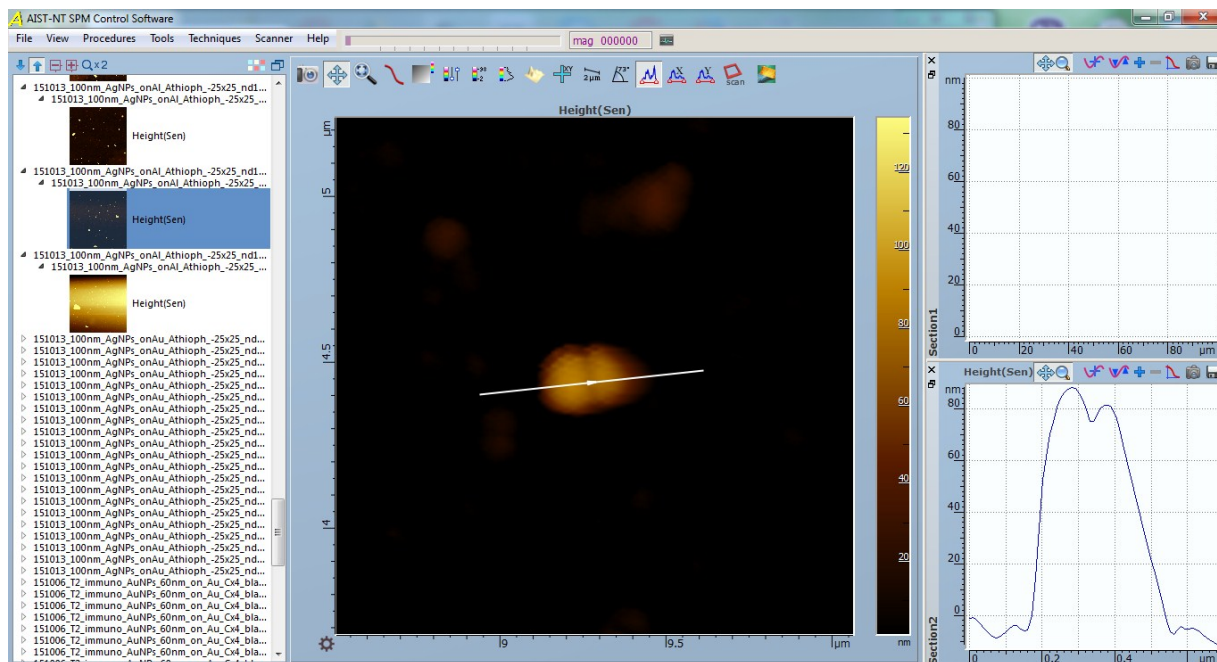

Fig. S8 Screen photo of one dimer (Ag NPs 100nm) on AFM map (20x20μm)



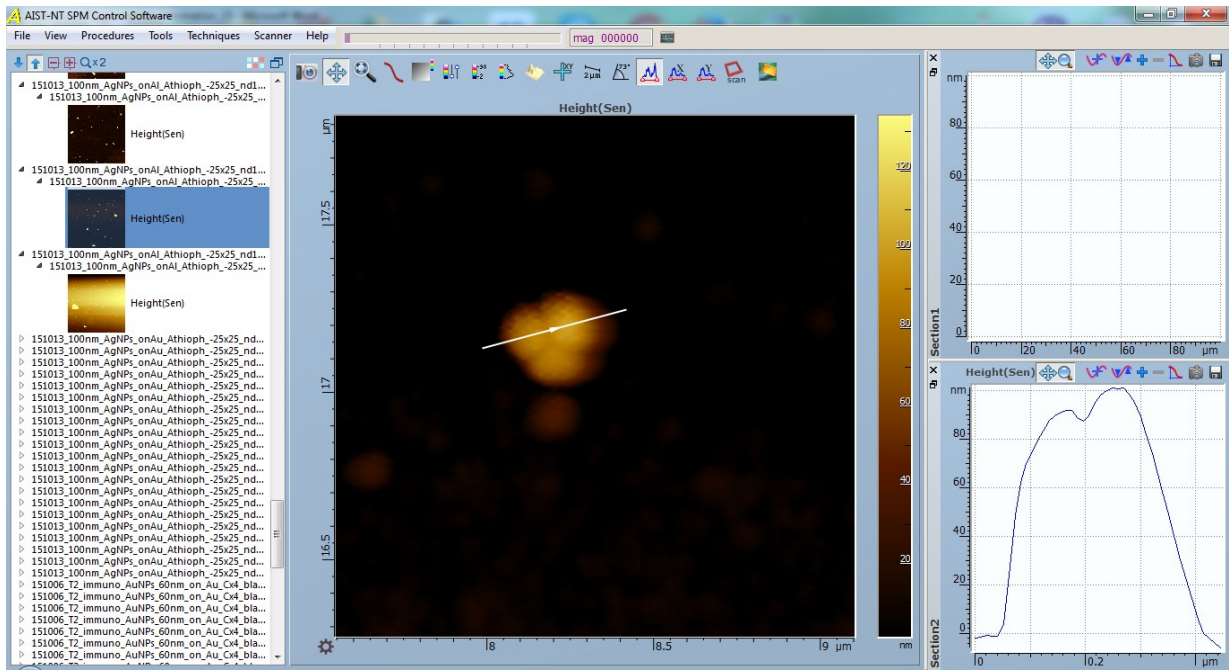

Fig. S9 Screen photo of one trimer (Ag NPs 100nm) on AFM map (20x20 $\mu$ m)

Example and order of combining Raman signal maps and AFM maps for Au NPs 60 nm on Si substrate in experiment 5. Original files (Origin 2015 and Aist-NT SPM) can be downloaded from: <https://www.dropbox.com/sh/7zpavdfitarvpbp/AAC7yWdfoUxZ2FkcbqUu0wUsa?dl=0>

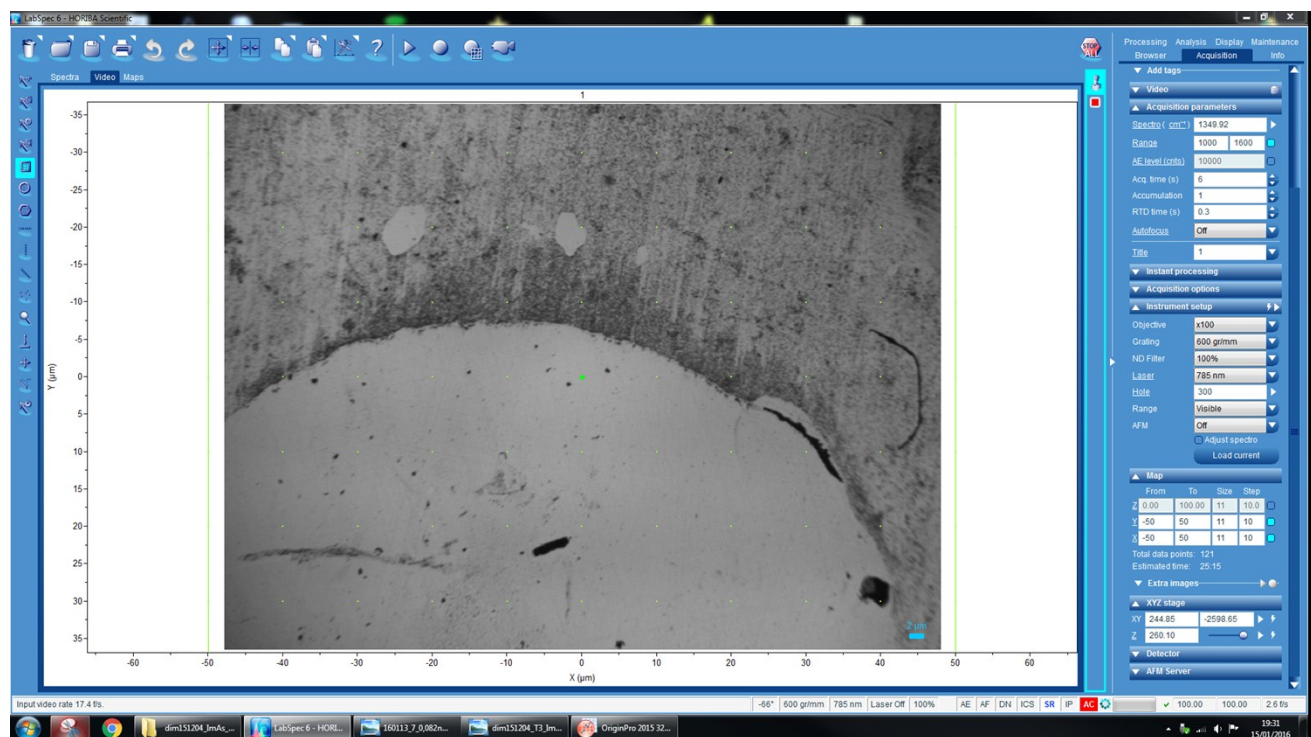

Fig. S10 – Screen photo (objective x10) before recording Raman map, in the center of this photo smaller maps (using objective x100) were recorded.

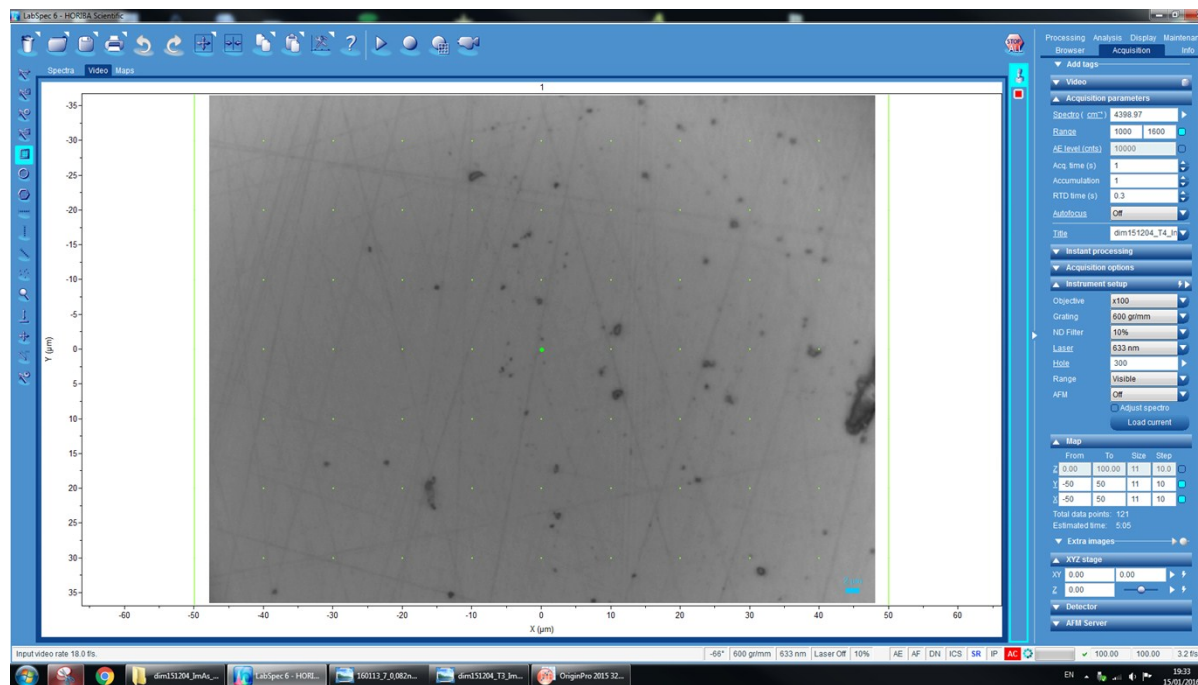

Fig. S11 Screen photo (objective x100) before recording Raman map 100x100 μm, in the same place as AFM map 100x100 μm.

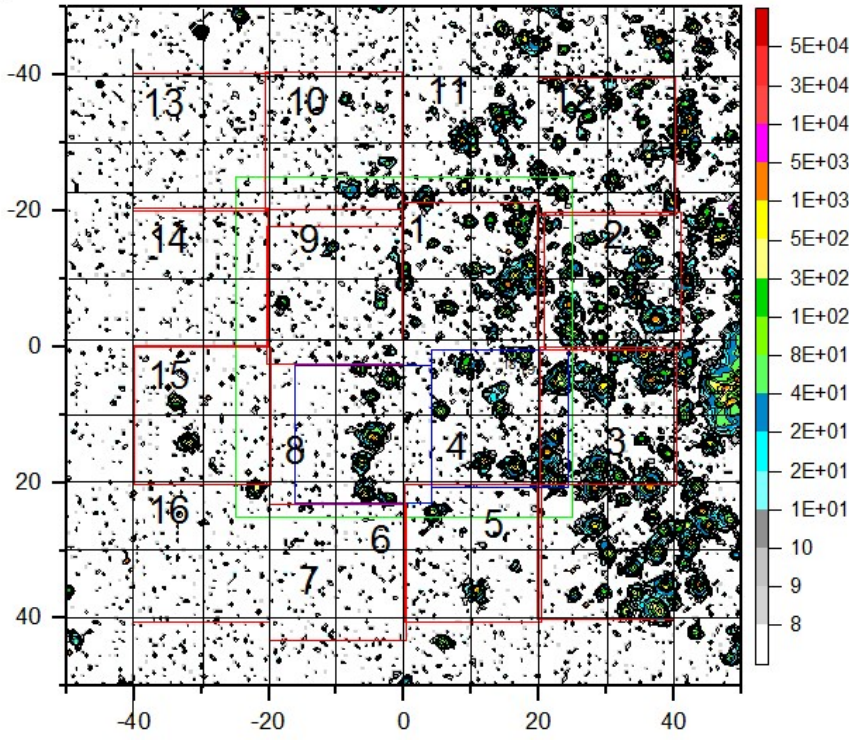

Fig. S12 Raman intensity map 100x100 μm (step 0.5 μm) for SERS signal determination from AuNPs 60 nm on Si, places marked by red squares where AFM maps 20x20 μm have been recorded

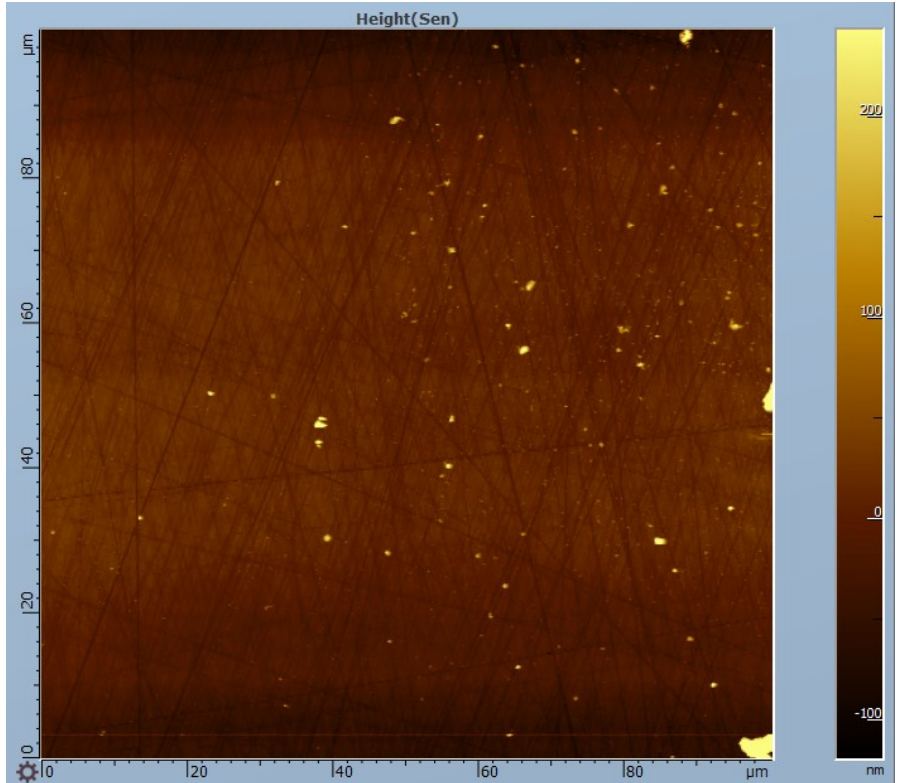

Fig. S13 Screen photo of one of the AFM maps 20x20 μm that were recorded using AFM map 100x100 μm as mask.

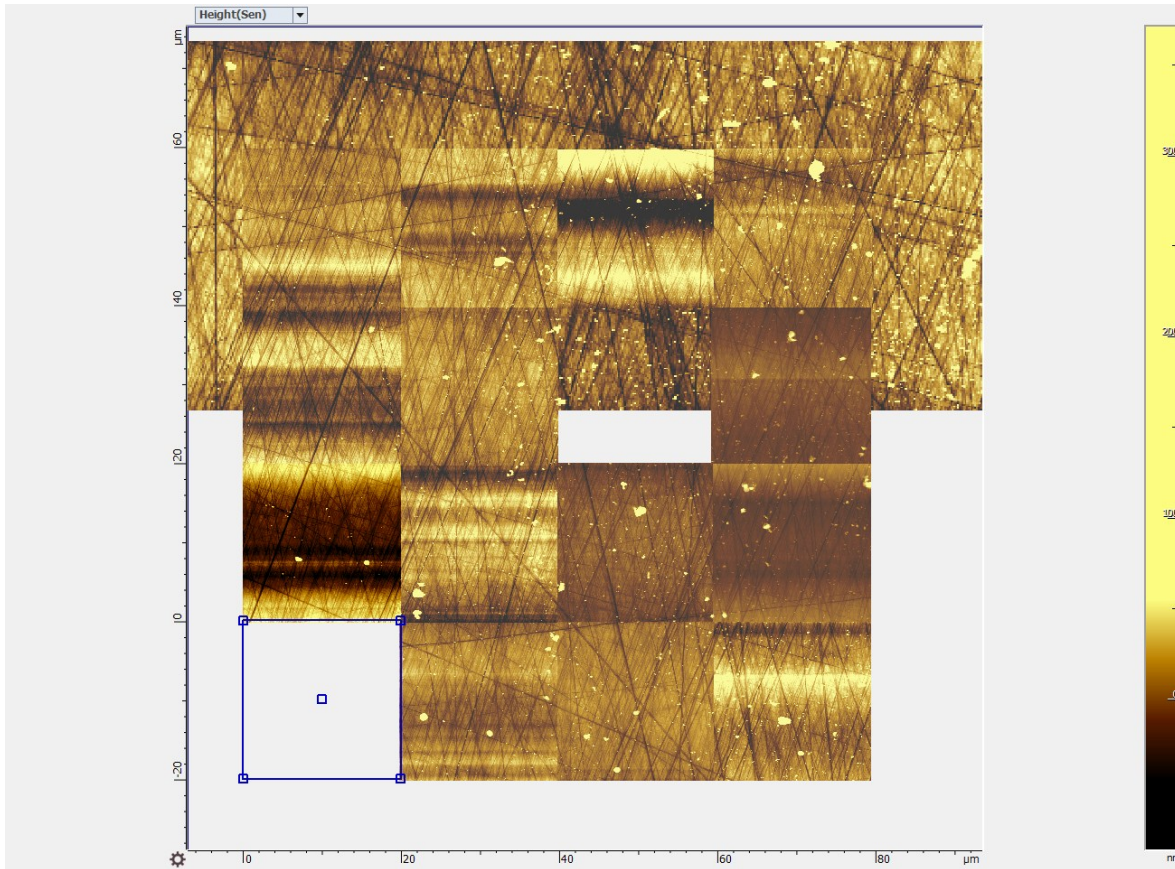

Fig. S14 Screen photo of AFM map 100x100 μm, (corresponded to Raman map), that was used as mask for recording AFM maps 20x20 μm

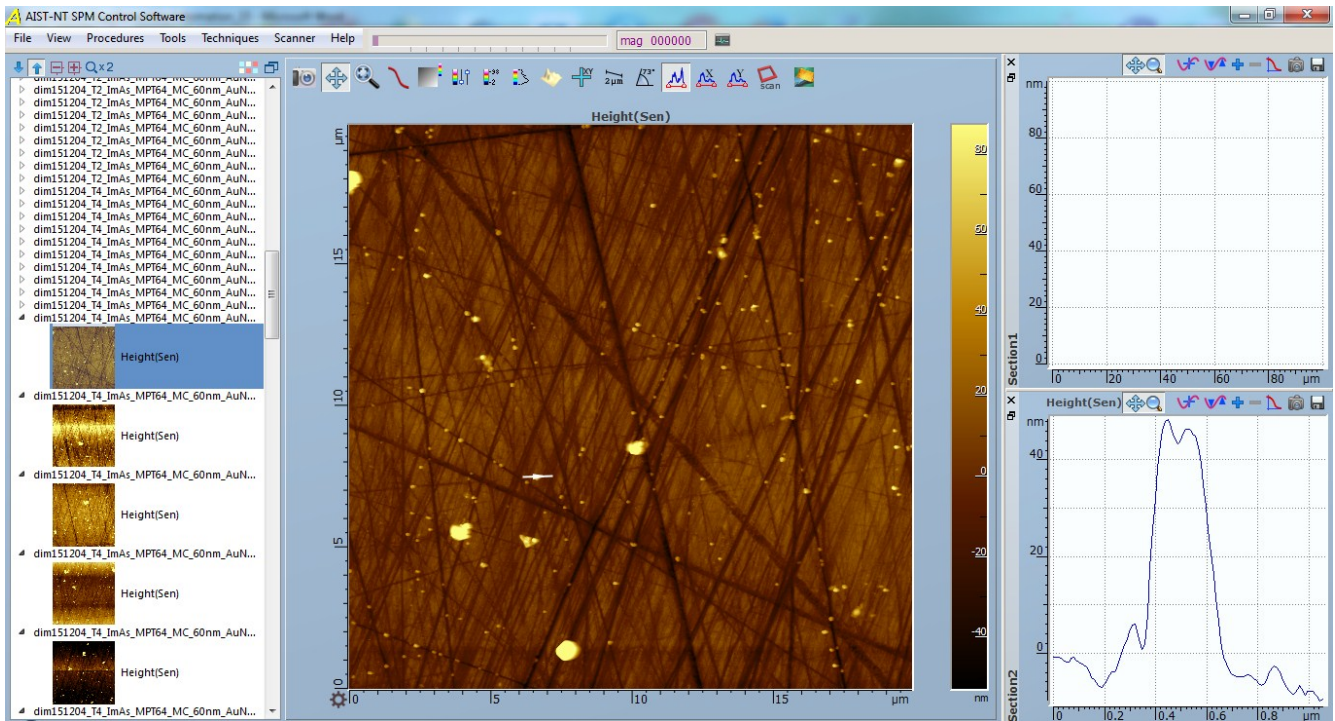

Fig. S15 Screen photo of one of 16 AFM maps 20x20  $\mu\text{m}$  that were recorded using AFM map 100x100  $\mu\text{m}$  as mask experiment 5; Sample: dim151204\_T4

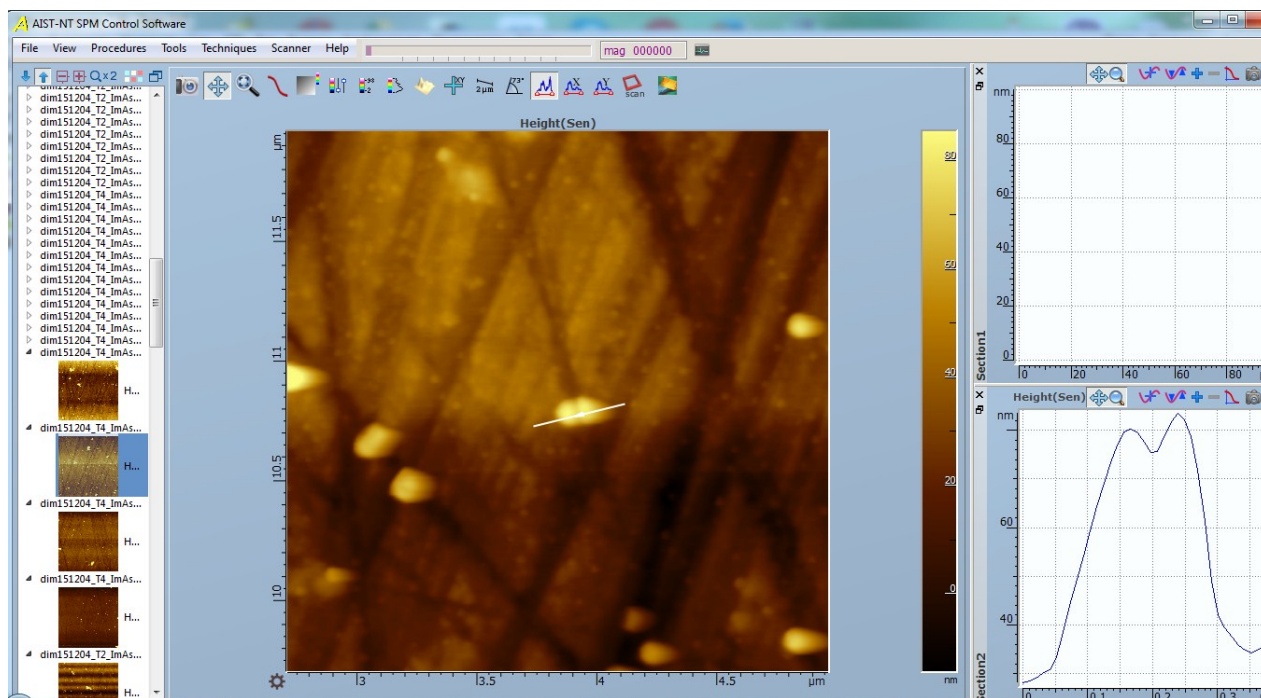

Fig. S16 Screen photo of dimer on AFM map (20x20 $\mu\text{m}$ ), experiment 5; Sample: dim151204\_T4

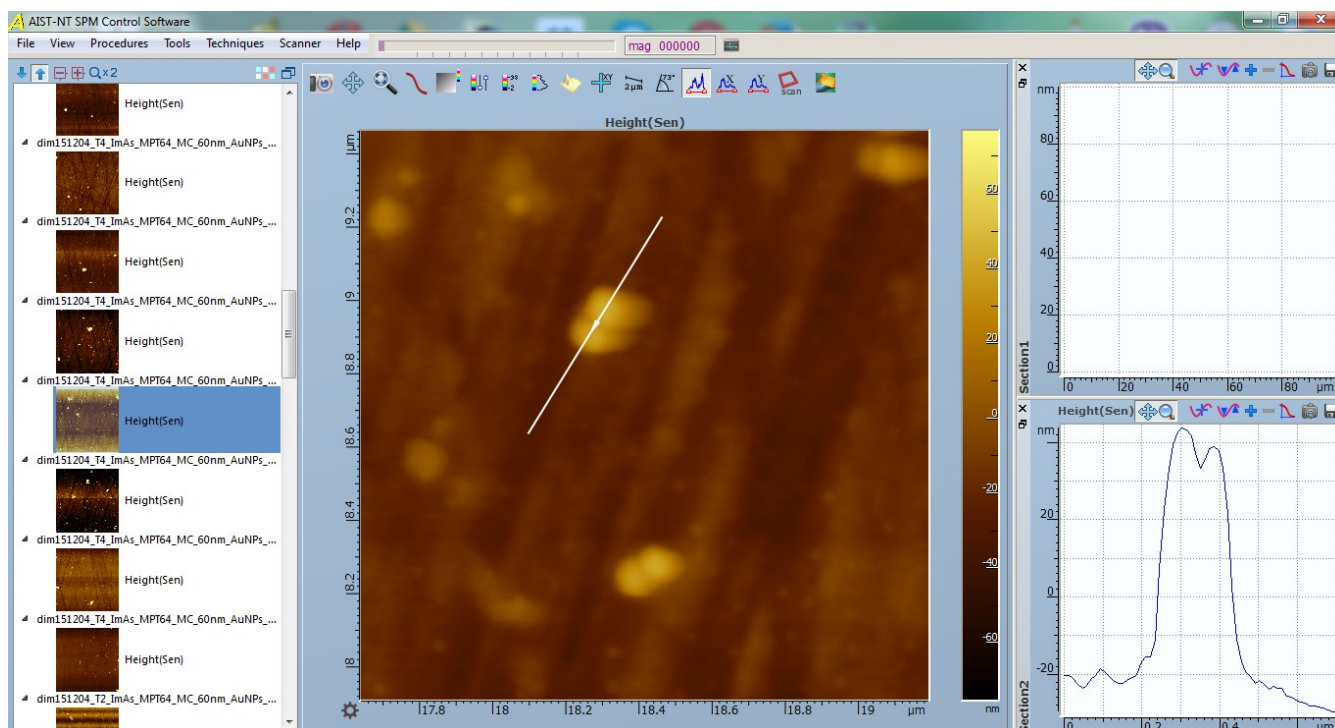

Fig. S17 Screen photo of two dimers on AFM map (20x20 $\mu\text{m}$ ), experiment 5; Sample: dim151204\_T4

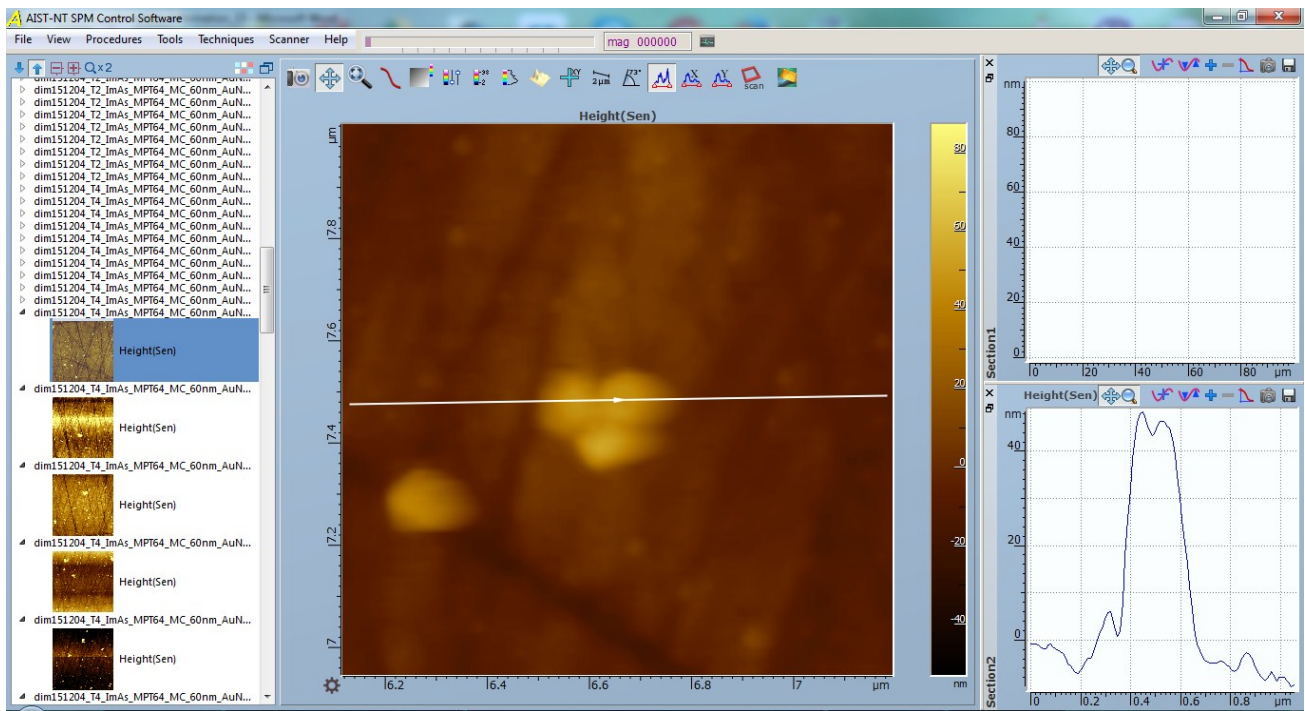

Fig. S18 Screen photo of trimer on AFM map (20x20 $\mu$ m), experiment 5; Sample: dim151204\_T4

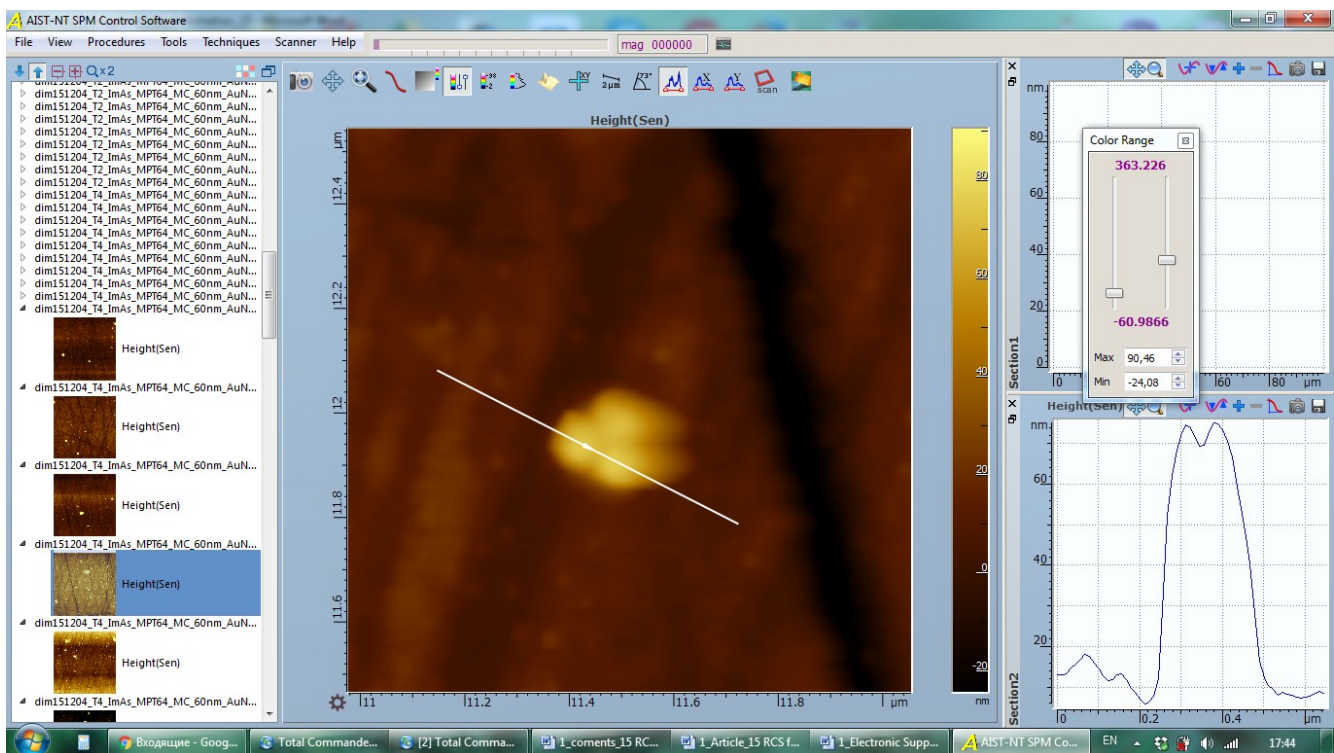

Fig. S19 Screen photo of trimer on AFM map (20x20 $\mu$ m), experiment 5; Sample: dim151204\_T4

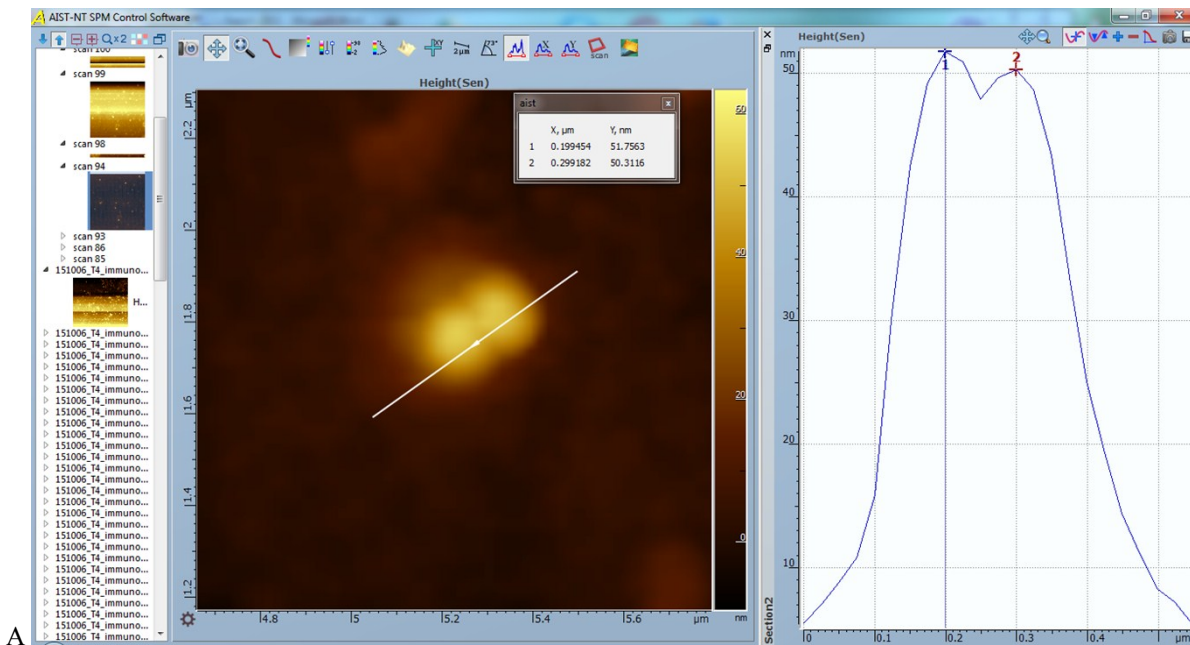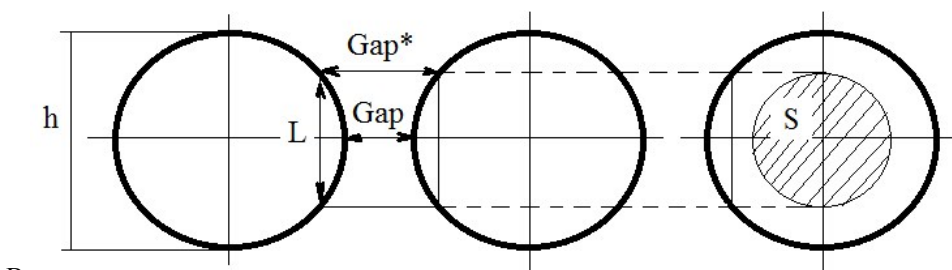

Fig. S20 Determination of the particle size and the distance between NPs (Gap), (A) using AIST-NT Software, (B) using TEM and calculation of mean hot spot cross section (S) between two NPs in dimers calculated from the length L (diameter) of the contact zone between NPs.

Here the interparticle gap is calculated from AFM cross section (on the right) as the difference in x-coordinates of two peaks for each nanoparticle minus the sum of heights of each nanoparticle. Under spherical approximation each height is assumed to be equal to the diameter of each nanoparticle.

## UV-vis absorption spectra of prepared sols of NPs.

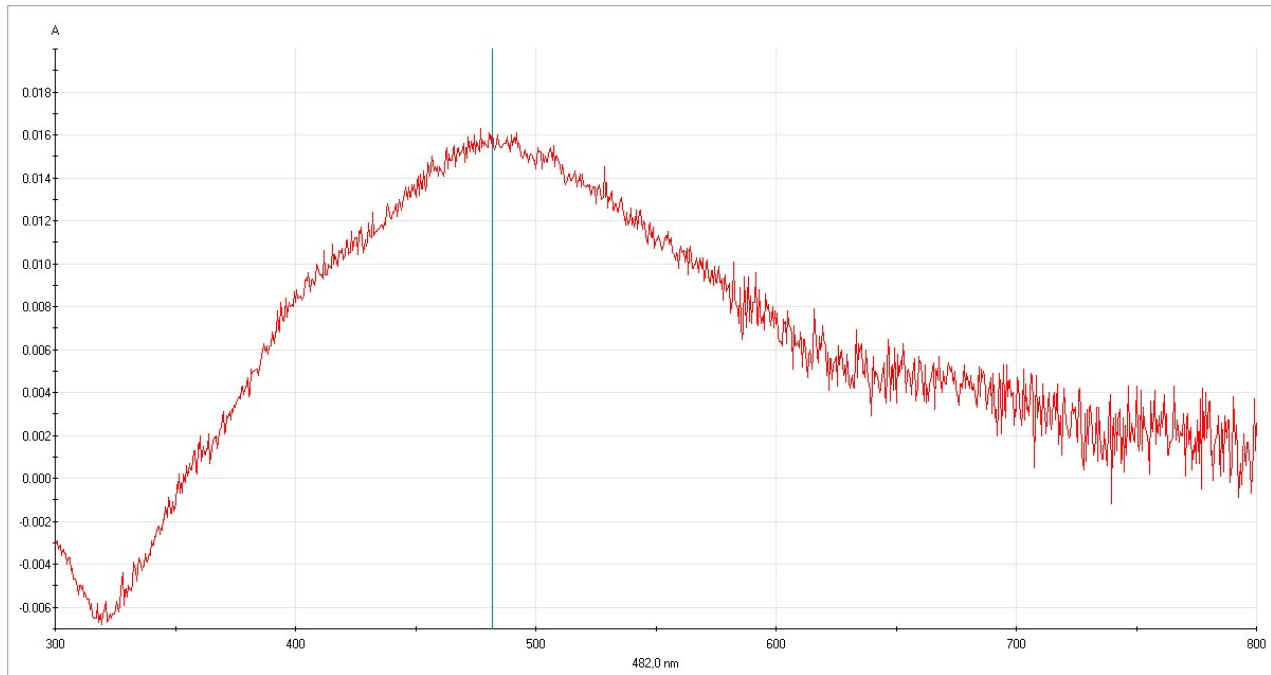

Fig. S21 UV-vis absorption spectra of prepared sol of Ag NPs 100 nm.

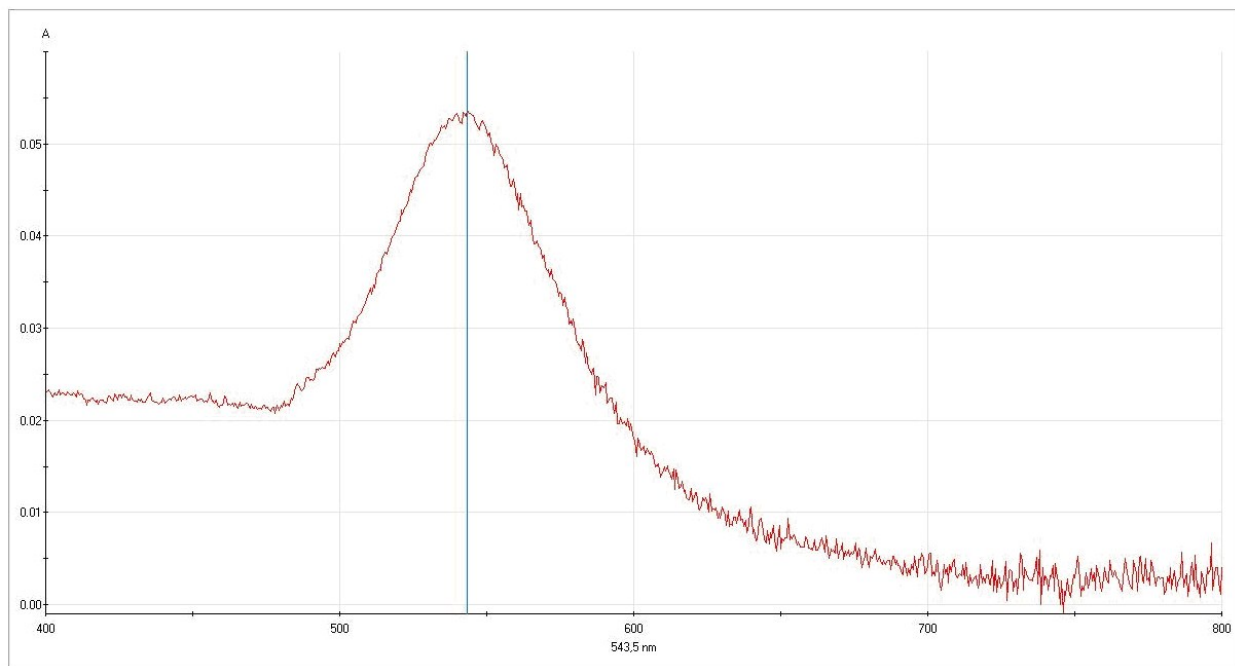

Fig. S22 UV-vis absorption spectra of prepared sol of Au NPs 60 nm.



**Measuring of particles size distribution in suspension using dynamic light scattering (DLS).**

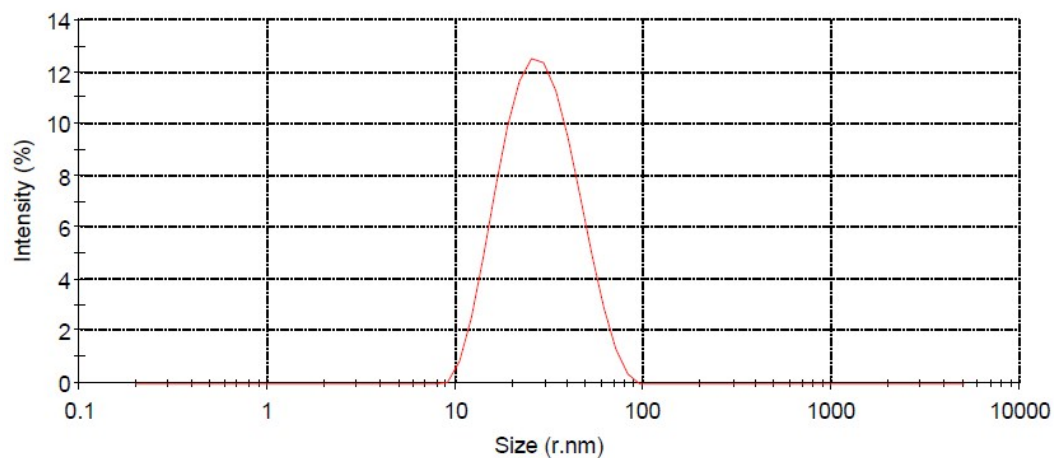

Fig. S23 Size distribution by intensity for suspension Au NPs 60 nm.

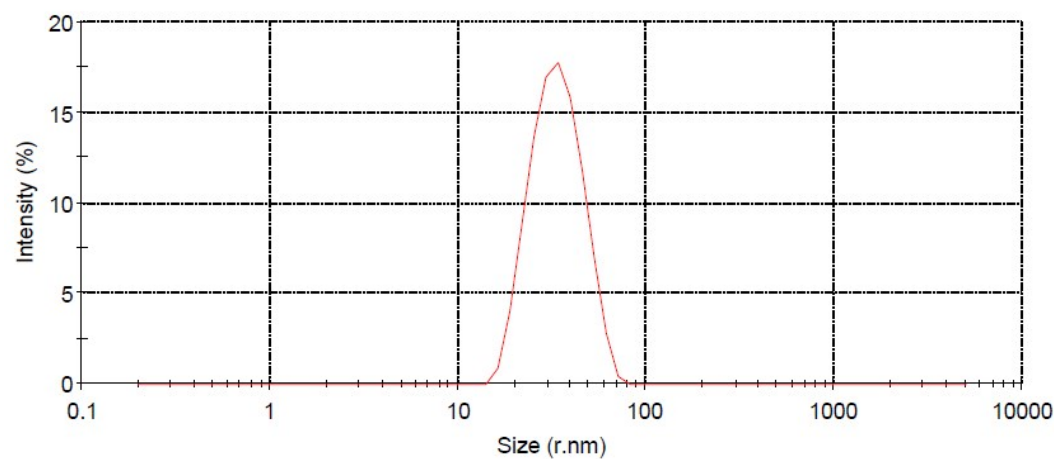

Fig. S24 Size distribution by intensity for ERL suspension (Au NPs 60 nm covered with antibody).

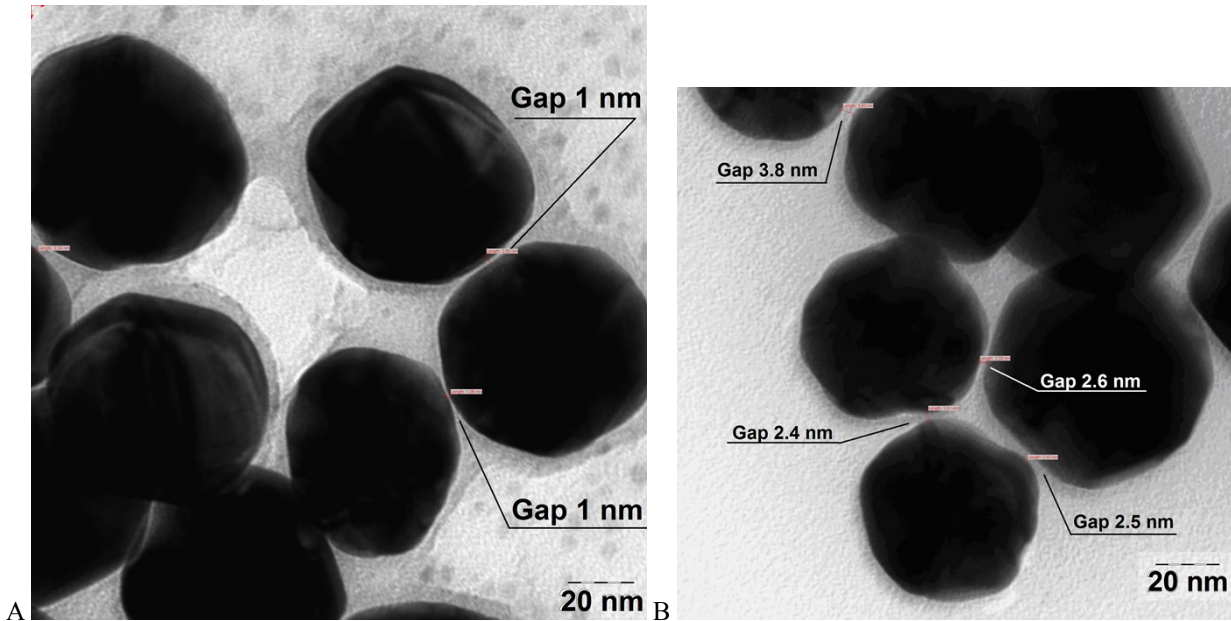

Fig. S25 (A, B) – TEM photo of Au NPs (60 nm) used in immunoassay as ERL on TEM grids.

---

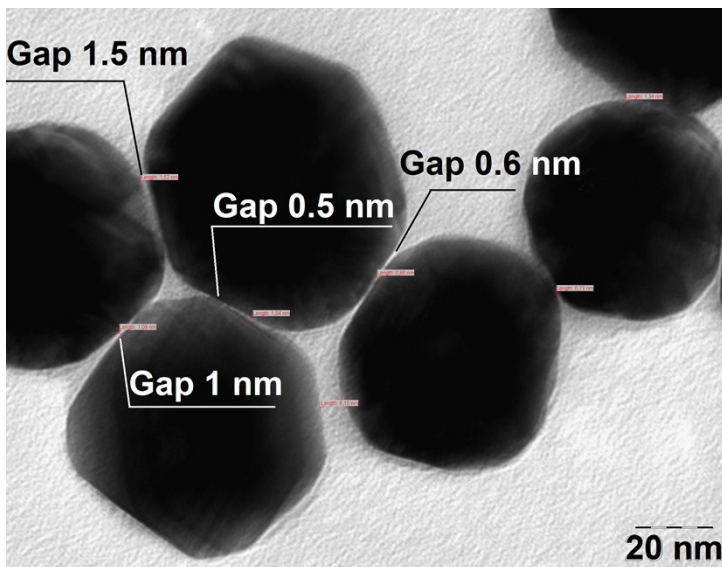

Fig. S26 TEM photo of Au NPs (60 nm) with analite 4-ATP on TEM grids.

---

More NPs TEM photos can be downloaded from:

<https://www.dropbox.com/sh/7zpvdfitarpybp/AAC7yWdfoUxZ2FkcbqUu0wUsa?dl=0>

Table S7. Datasheet for Experiment One ( remade with 10% power) observing 2-MOTP modified AuNPs and AgNPs (80 nm) on Au and Ag film.

| AuNPs_80nm_Au                  | Hight(Average) | Intensity | AuNP_80nm_Ag           | Hight(Average) | Intensity |
|--------------------------------|----------------|-----------|------------------------|----------------|-----------|
| M1                             | 77             | 384       | M1                     | 58             | 288       |
| M2                             | 64             | 775       | M2                     | 76             | 740       |
| M3                             | 57             | 125       | M3                     | 70             | 354       |
| M4                             | 76             | 371       | M4                     | 72             | 655       |
| M5                             | 56             | 135       | M5                     | 58             | 871       |
| M6                             | 77             | 667       | M6                     | 68             | 409       |
| M7                             | 66             | 384       | M7                     | 71             | 441       |
| M8                             | 76             | 329       | M8                     | 71             | 355       |
| M9                             | 76             | 820       | M9                     | 63             | 807       |
| M10                            | 85             | 404       | M10                    | 61             | 595       |
| M11                            | 77             | 836       | D1                     | 70             | 1024      |
| M12                            | 75             | 230       | D2                     | 78             | 2249      |
| M13                            | 83             | 719       | D3                     | 85             | 2932      |
| M14                            | 101            | 848       | D4                     | 70             | 2370      |
| M15                            | 84             | 726       | D5                     | 65             | 2539      |
| D1                             | 75             | 1363      | D6                     | 72             | 2088      |
| D2                             | 80             | 1408      | D7                     | 85             | 589       |
| D3                             | 78             | 2049      | D8                     | 103            | 1685      |
| D4                             | 80             | 2744      | D9                     | 77             | 1024      |
| D5                             | 58             | 610       | D10                    | 60             | 2222      |
| D6                             | 70             | 1154      |                        |                |           |
| D7                             | 73             | 1275      |                        |                |           |
| D8                             | 93             | 825       |                        |                |           |
| D9                             | 80             | 1825      |                        |                |           |
| D10                            | 70             | 1275      |                        |                |           |
| <b>Substrate</b>               | <b>Gold</b>    |           | <b>Silver</b>          |                |           |
| AuNPs_80nm_Au                  | MON            | DIM       | AuNPs_80nm_Ag          | MON            | DIM       |
| NPs                            | 15             | 10        | NPs                    | 10             | 10.00     |
| INTENSITY                      | 516            | 1452      | INTENSITY              | 551            | 1872      |
| STDEV                          | 262            | 617       | STDEV                  | 210            | 764       |
| Background                     | 7.5            |           |                        | 5.4            |           |
| I BG corrected                 | 509            | 1445      |                        | 546            | 1866      |
| Signal per 1mW                 | 807            | 2269      |                        | 861            | 2925      |
| Signal per 1mW BG corrected, I | 795            | 2258      |                        | 853            | 2916      |
| Enhancement Factor(EF)         | 8.70E+06       | 1.23E+07  | Enhancement Factor(EF) | 9.30E+06       | 1.60E+07  |
| <b>Conclusion</b>              | <b>Gold</b>    |           | <b>Silver</b>          |                |           |
| I SERS dimer/I SERS monomer    | 2.84           |           | 3.42                   |                |           |

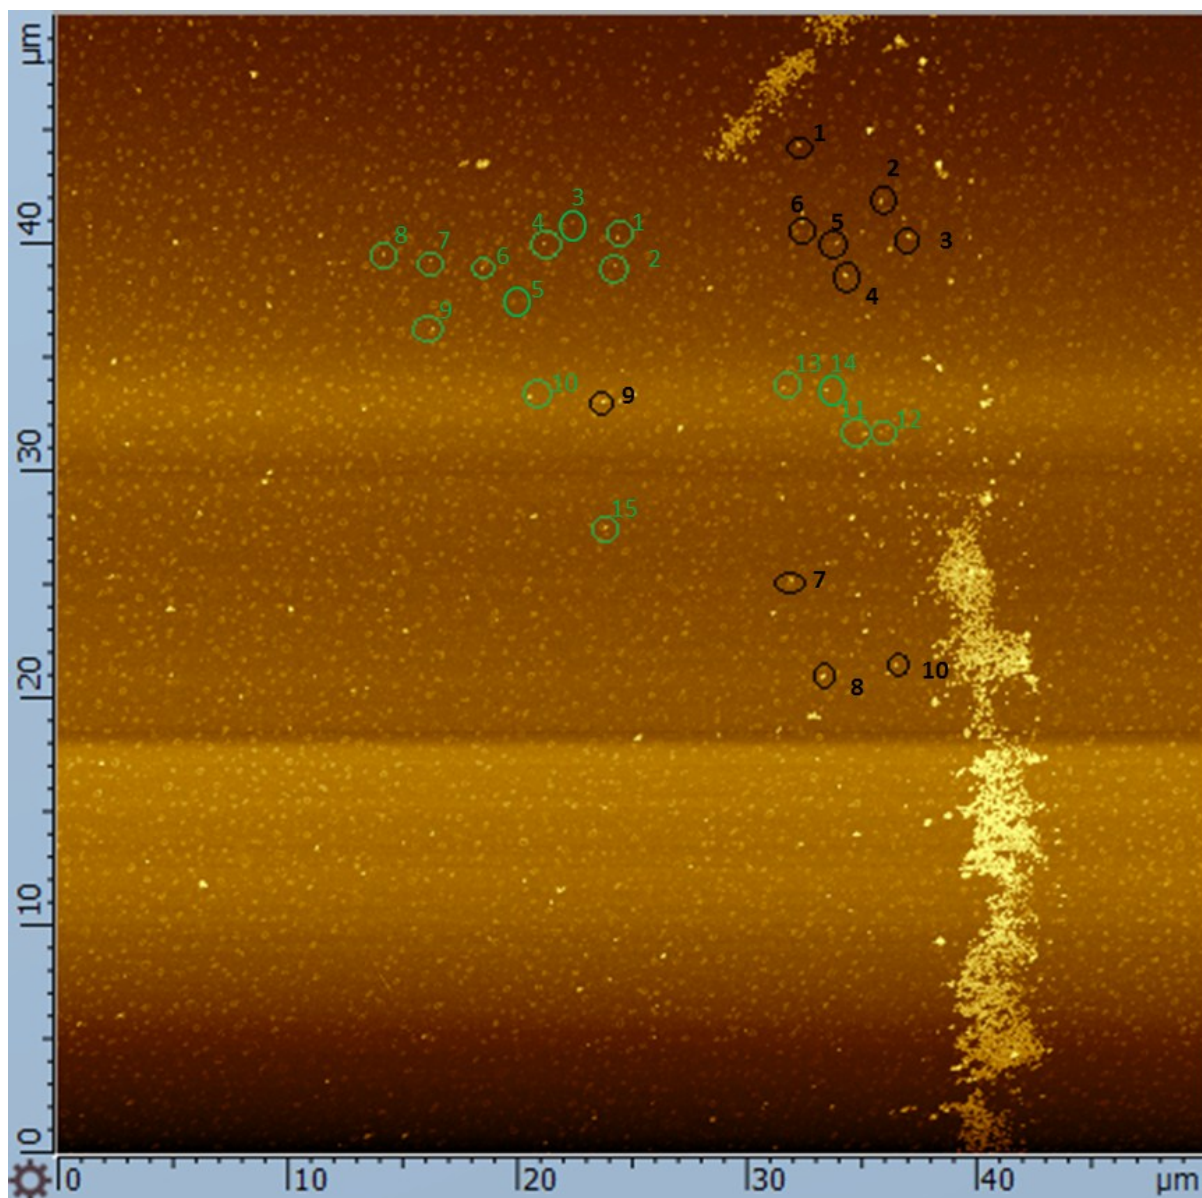

Fig. S27 AFM image AuNPs\_80 nm /Au film (experiment One data in Table S6). Monomers are circled in green color, dimmers are circled in black color. This area will be shown on Raman map on the next page

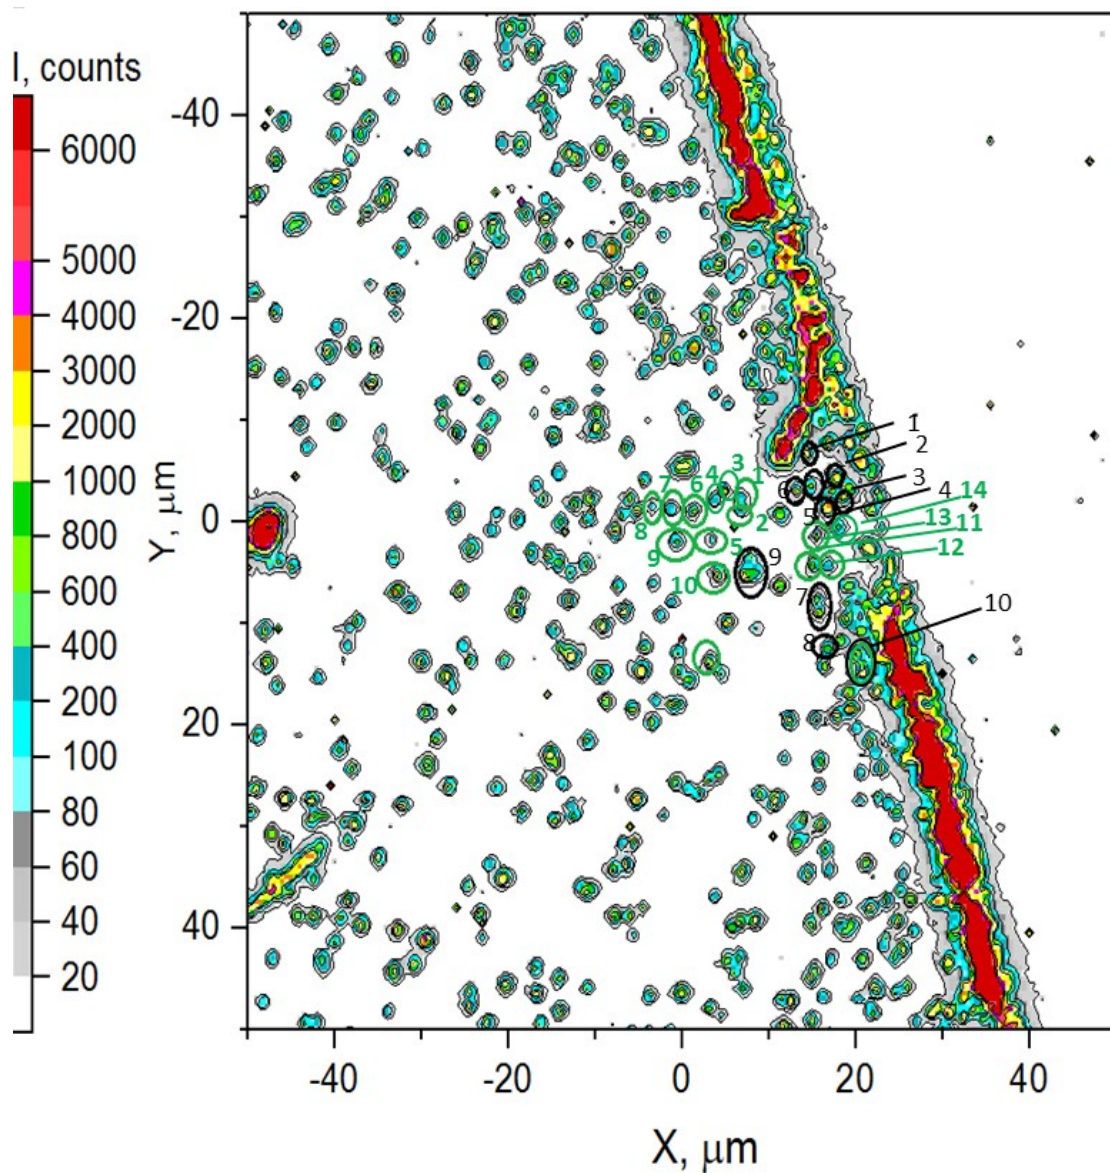

Figure S28. Raman map image (performed by ORIGIN PRO2016) AuNPs<sub>80</sub>/Au from Experiment One. Zoomed AFM image is shown on Fig. S27. Monomers are circled in green color, dimmers are circled in black color.
